# Supplementary material
Source: PubMed Central journal article supplement (PMC8278668)
Supplement: NIHMS1664418-supplement-2.pdf [file NIHMS1664418-supplement-2.pdf]

hu5A10 radioimmunotheranostics

**Supplementary Table S1. Dosimetry of [<sup>225</sup>Ac]hu5A10 (11.1 kBq/500nCi) and [<sup>90</sup>Y]hu5A10 (18.5 MBq/500μCi) in the LNCaP-AR s.c. model.**

| Organs           | <b>[<sup>225</sup>Ac]hu5A10</b> |                                  | <b>[<sup>90</sup>Y]hu5A10</b> |                                  |
|------------------|---------------------------------|----------------------------------|-------------------------------|----------------------------------|
|                  | <b>Absorbed dose (Gy)</b>       | <b>Absorbed Dose/IA (Gy/MBq)</b> | <b>Absorbed dose (Gy)</b>     | <b>Absorbed Dose/IA (Gy/MBq)</b> |
| <b>Intestine</b> | 0.2                             | 18.02                            | 1.2                           | 0.22                             |
| <b>Spleen</b>    | 2.77                            | 249.55                           | 3.26                          | 0.59                             |
| <b>Liver</b>     | 1.98                            | 178.38                           | 5.36                          | 0.97                             |
| <b>Kidney</b>    | 0.44                            | 39.64                            | 2.19                          | 0.40                             |
| <b>Lungs</b>     | 0.77                            | 69.37                            | 2.98                          | 0.54                             |
| <b>Heart</b>     | 0.38                            | 34.23                            | 2.61                          | 0.47                             |
| <b>Tumor</b>     | 9.3                             | 837.84                           | 13.37                         | 2.41                             |

IA – injected activity
