# Supplementary material
Source: PubMed Central journal article supplement (PMC8278668)
Supplement: NIHMS1664418-supplement-3.pdf [file NIHMS1664418-supplement-3.pdf]

## hu5A10 radioimmunotheranostics

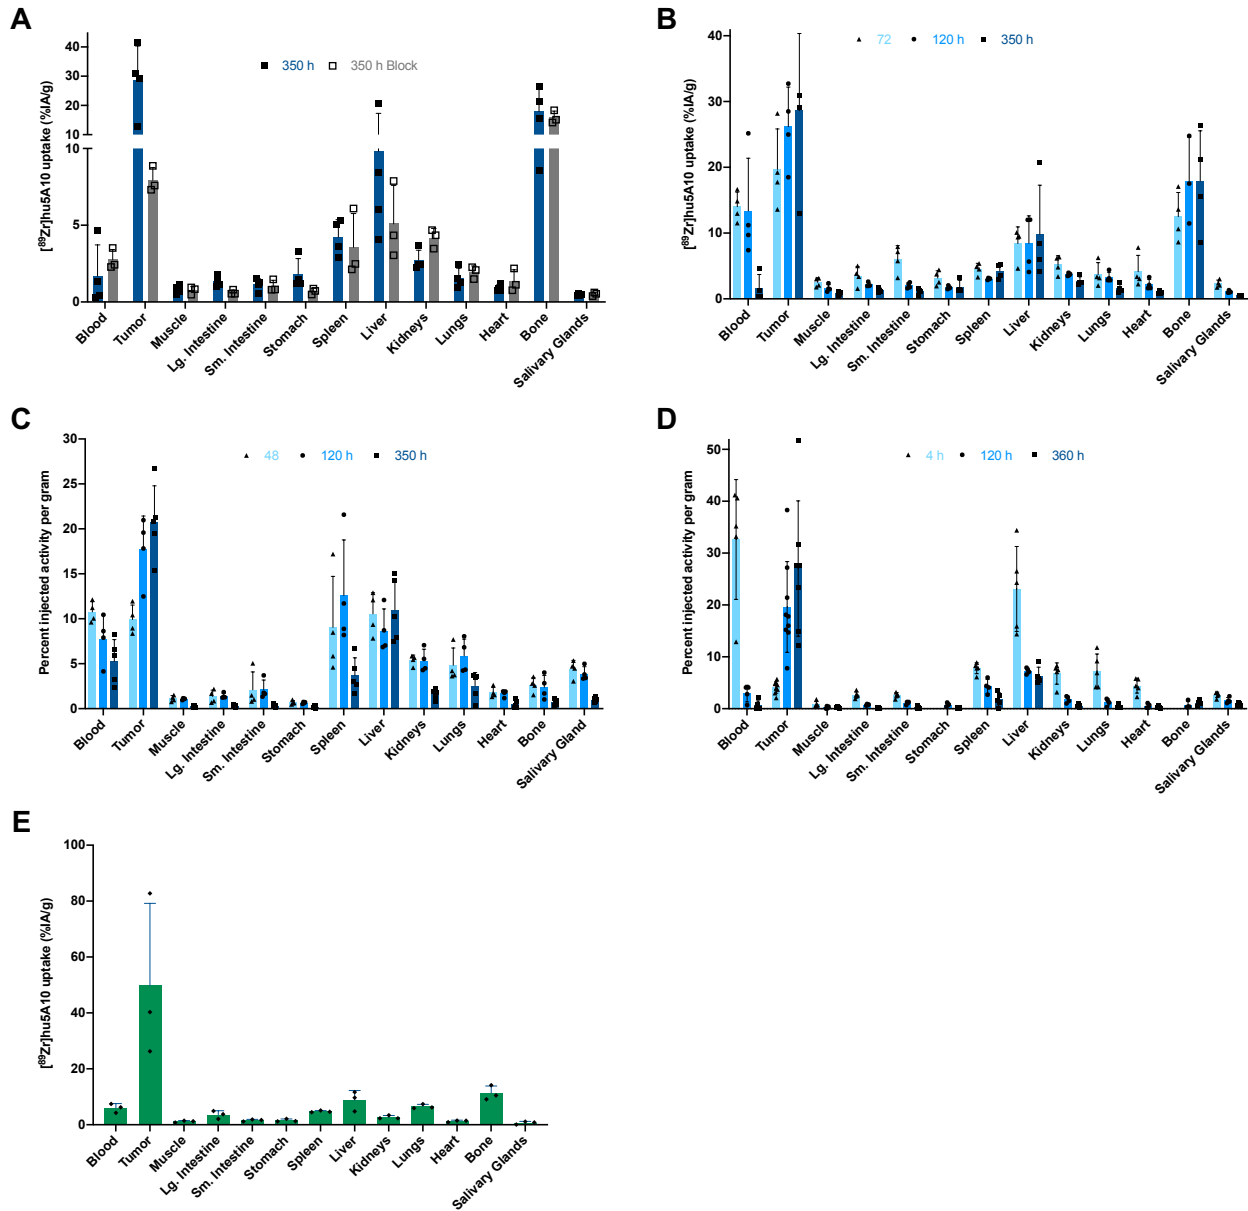

**Supplementary Figure S1. Ex-vivo biodistribution of  $^{89}\text{Zr}$ hu5A10.** (A) Specificity of hu5A10. Mice with LNCaP-AR tumors were injected with 4.07MBq/110 $\mu\text{Ci}$   $^{89}\text{Zr}$ hu5A10 without or with 1 mg cold antibody (block; n=3-4). (B-D) Biodistribution of  $^{89}\text{Zr}$ hu5A10 (4.07MBq; 110 $\mu\text{Ci}$ ; B),  $^{90}\text{Y}$ hu5A10 (5.55MBq; 150 $\mu\text{Ci}$ ; C), and  $^{225}\text{Ac}$ hu5A10 (11 kBq; 300nCi; D) over time in the LNCaP-AR tumor (n=3-5 per time point, except for  $^{225}\text{Ac}$ hu5A10 tumor uptake: n=7-9 tumors). (E) Biodistribution in MDAPCa2b xenografts at 120h p.i. of 4.07MBq/110 $\mu\text{Ci}$   $^{89}\text{Zr}$ hu5A10. Columns represent mean and error bars SD. Sm. Intestine – small intestine, VP – ventral prostate
