# Supplementary material
Source: PubMed Central journal article supplement (PMC8278668)
Supplement: NIHMS1664418-supplement-4.pdf [file NIHMS1664418-supplement-4.pdf]

## hu5A10 radioimmunotheranostics

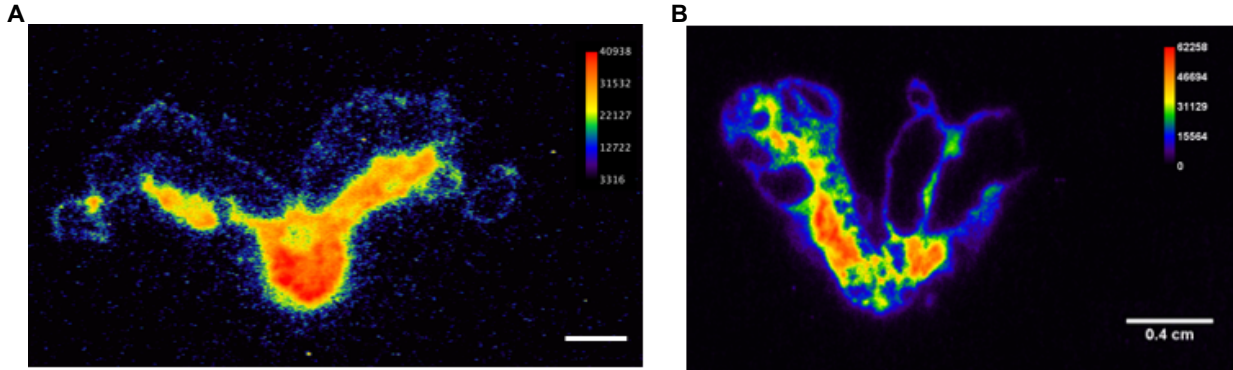

**Supplementary Figure S2.** Autoradiography of whole mounted *KLK3\_Hi-MYC* GEMM prostate sections obtained 120h p.i. of  $[^{89}\text{Zr}]\text{hu5A10}$  (**A**) or  $[^{90}\text{Y}]\text{hu5A10}$  (**B**). Radioimmunoconjugate activity was detected in regions expressing PSA, but not in adjacent tissues lacking PSA expression, such as seminal vesicles and urethra.
