# Supplementary material
Source: PubMed Central journal article supplement (PMC8278668)
Supplement: NIHMS1664418-supplement-5.pdf [file NIHMS1664418-supplement-5.pdf]

## hu5A10 radioimmunotheranostics

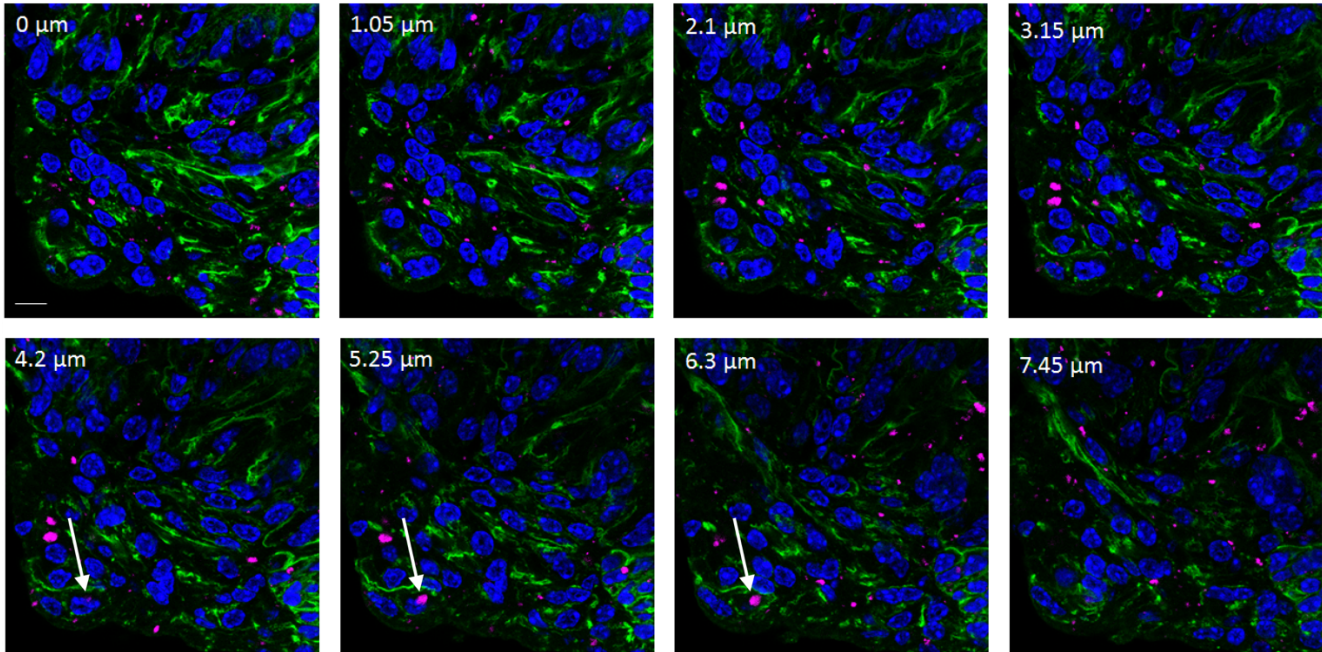

**Supplementary Figure S3. Subcellular localization of hu5A10.** Distribution of the fluorescent Cy5.5-hu5A10 throughout the dorsolateral prostate (1 out of 5 is shown). Additional z-stack data supplementing the data in Figure 3C,D are shown. Arrows indicate lysosomal accumulation of the Cy5.5-hu5A10:fPSA complex in prostate tissue of the *KLK3*\_Hi-MYC GEMM.
