# Supplementary material
Source: PubMed Central journal article supplement (PMC8278668)
Supplement: NIHMS1664418-supplement-6.pdf [file NIHMS1664418-supplement-6.pdf]

## hu5A10 radioimmunotheranostics

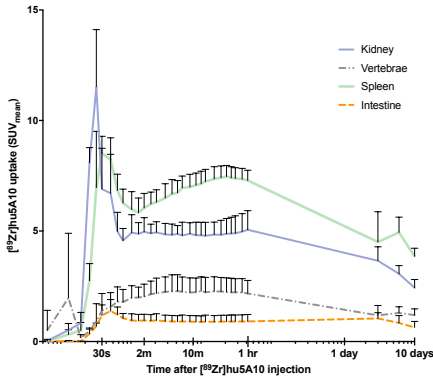

**Supplementary Figure S3.** Male cynomolgus macaque were intravenously administered  $115 \pm 1 \text{ MBq}$  ( $3.1 \pm 0.3 \text{ mCi}$ ) of  $[^{89}\text{Zr}]\text{hu5A10}$  at  $0.2 \text{ mg/kg}$  for longitudinal immune-PET imaging. Time-activity curves of  $[^{89}\text{Zr}]\text{hu5A10}$  for kidney, spleen, bone (vertebra) and intestine ( $n=3$ ).  $\text{SUV}_{\text{mean}}$  (mean+range) were calculated for each organ VOI and plotted over time.
